# Supplementary material for: Temperature and Moisture Gradients Drive the Shifts of the Bacterial Microbiomes in 1000-Year-Old Mausoleums
Source: MDPI journal article supplement (doi:10.3390/atmos14010014), 2022-12-22
Supplement: s1 [file s1]

Archive with 1 entries (1 files):
- atmosphere-2093074-supplementary-done.pdf
