# Supplementary material for: Temperature and Moisture Gradients Drive the Shifts of the Bacterial Microbiomes in 1000-Year-Old Mausoleums
Source: MDPI journal article supplement (doi:10.3390/atmos14010014), 2022-12-22
Supplement: s1 [file s1 › atmosphere-2093074-supplementary-done.pdf]

# Supplementary Materials: Temperature and Moisture Gradients Drive the Shifts of the Bacterial Microbiomes in 1000-Year-Old Mausoleums

Xin Li <sup>1,\*</sup>, Xiao'ai Zhou <sup>1</sup>, Chen Wu <sup>2</sup>, Evangelos Petropoulos <sup>3</sup>, Yongjie Yu <sup>2,3,4,\*</sup> and Youzhi Feng <sup>4</sup>

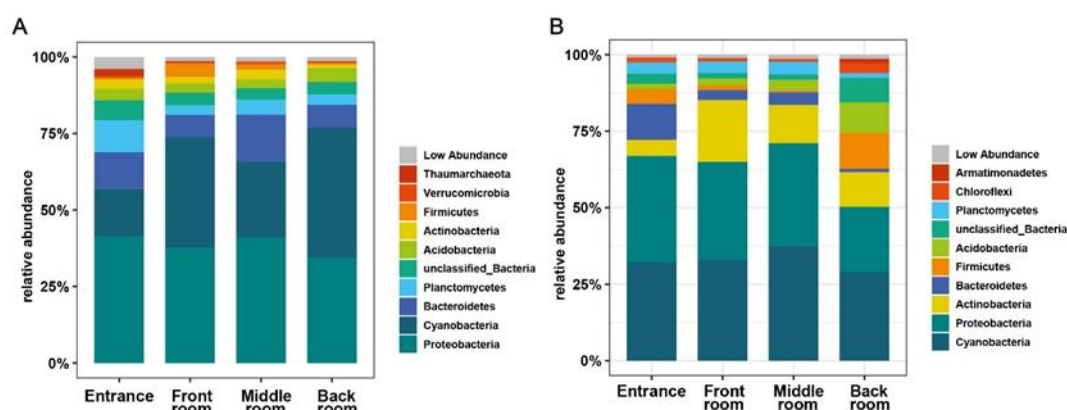

**Figure S1.** Relative abundances of bacterial community composition at phylum level on the bricks in the Shunling (A) and Qinling mausoleums (B).

**Table S1.** Dissimilarity tests of bacterial communities among different positions in the Shunling mausoleum using Permutational multivariate analysis.

|                           | F.Model | R <sup>2</sup> | p.value |
|---------------------------|---------|----------------|---------|
| Back room vs Middle room  | 3.293   | 0.190          | 0.003   |
| Back room vs Front room   | 4.598   | 0.247          | 0.002   |
| Back room vs Entrance     | 11.502  | 0.451          | 0.001   |
| Middle room vs Front room | 3.478   | 0.199          | 0.011   |
| Middle room vs Entrance   | 4.565   | 0.246          | 0.001   |
| Front room vs Entrance    | 10.016  | 0.417          | 0.001   |

**Table S2.** Dissimilarity tests of bacterial communities among different sites in the Qinling mausoleum using Permutational multivariate analysis.

|                           | F.Model | R <sup>2</sup> | p.value |
|---------------------------|---------|----------------|---------|
| Back room vs Middle room  | 5.426   | 0.279          | 0.001   |
| Back room vs Front room   | 5.403   | 0.278          | 0.001   |
| Back room vs Entrance     | 6.016   | 0.301          | 0.001   |
| Middle room vs Front room | 3.266   | 0.189          | 0.004   |
| Middle room vs Entrance   | 7.932   | 0.362          | 0.001   |
| Front room vs Entrance    | 6.651   | 0.322          | 0.001   |

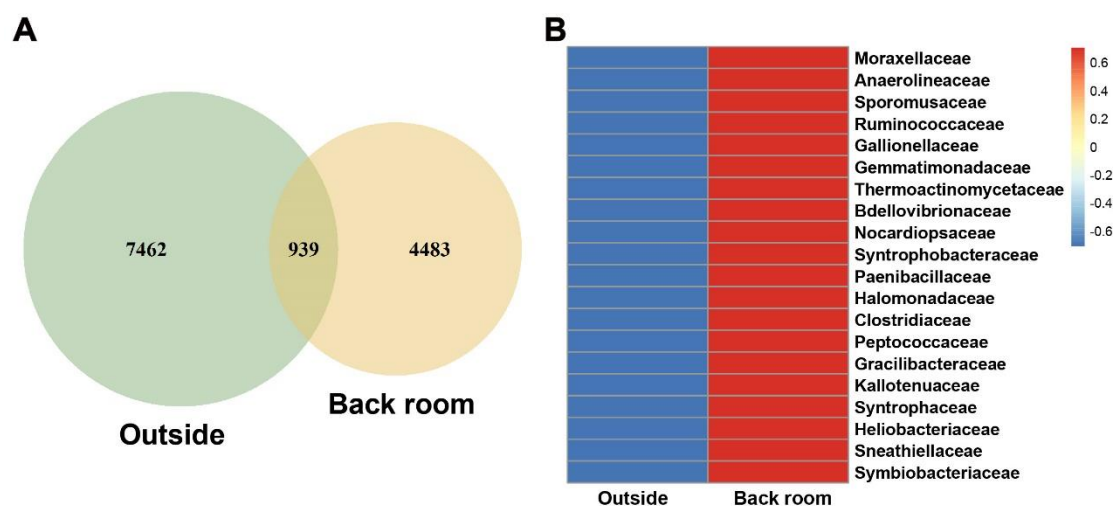

**Figure S2.** Endemic OTUs taxa in the back room of Qinling Mausoleum. (A) Venn plot of OTUs taxa between soil outside the mausoleum and the back room of Qinling Mausoleum. (B) Heat map of family level species annotation of endemic OTUs for the top 20 abundances in Qinling Mausoleum back room.

**Disclaimer/Publisher's Note:** The statements, opinions and data contained in all publications are solely those of the individual author(s) and contributor(s) and not of MDPI and/or the editor(s). MDPI and/or the editor(s) disclaim responsibility for any injury to people or property resulting from any ideas, methods, instructions or products referred to in the content.
